# Supplementary material for: Integrating Videoconferencing Into Treatment for Obsessive-Compulsive Disorder: Practical Strategies With Case Examples
Source: Atypon-hosted journal article supplement (doi:10.1176/appi.ps.202000558), 2021-03-26
Supplement: appi.ps.202000558.ds001.pdf [file appi.ps.202000558.ds001.pdf]

| STRATEGY                                                                                     | ADVANTAGES                                                                                                                                                                                                                                                                                                                                                                                                                                                                                                                                                                                                                                                                                                                                                                                                                                | POTENTIAL CHALLENGES                                                                                                                                                                                                                                                                                                                                                                                        |
|----------------------------------------------------------------------------------------------|-------------------------------------------------------------------------------------------------------------------------------------------------------------------------------------------------------------------------------------------------------------------------------------------------------------------------------------------------------------------------------------------------------------------------------------------------------------------------------------------------------------------------------------------------------------------------------------------------------------------------------------------------------------------------------------------------------------------------------------------------------------------------------------------------------------------------------------------|-------------------------------------------------------------------------------------------------------------------------------------------------------------------------------------------------------------------------------------------------------------------------------------------------------------------------------------------------------------------------------------------------------------|
| <b>1. Hybrid in-person and videoconferencing-assisted EX/RP</b>                              | <ul style="list-style-type: none"> <li>a) Maintains alliance-quality associated with in-person appointments</li> <li>b) Therapist can closely supervise early exposures</li> <li>c) Flexibility in appointments (e.g., unexpected change in childcare)</li> <li>d) Facilitate home visits</li> <li>e) Prevent disruption in or attrition from treatment (e.g., with illness, relocation)</li> </ul>                                                                                                                                                                                                                                                                                                                                                                                                                                       | <ul style="list-style-type: none"> <li>a) Convenience of remote appointments could reduce motivation to attend in-person sessions</li> <li>b) May need to redesign ongoing exposures after transitioning to remote treatment</li> <li>c) Licensure issues may arise with changes in location, requiring clinicians to apply for limited licensure or arrange local referrals</li> </ul>                     |
| <b>2. Fully-remote EX/RP</b>                                                                 | <ul style="list-style-type: none"> <li>a) Improve access to care for patients unable to come on-site (e.g., patients who are homebound or live in rural areas)</li> <li>b) Lack of commute may benefit patients who are elderly, disabled, or have young children</li> <li>c) Some patients may be more comfortable with remote format (e.g., patients experiencing shame related to symptoms)</li> <li>d) Completing exposures remotely may encourage independence and sense of mastery</li> </ul>                                                                                                                                                                                                                                                                                                                                       | <ul style="list-style-type: none"> <li>a) Therapists may have more difficulty providing corrective feedback than if in-person</li> <li>b) Some exposures rely on therapist's physical presence</li> <li>c) Not appropriate for patients who have difficulty adhering to EX/RP, certain comorbidities (e.g., psychosis, severe personality disorder) or acute safety concerns (e.g., suicidality)</li> </ul> |
| <b>3. Videoconferencing-assisted psychiatric evaluation and psychopharmacology treatment</b> | <ul style="list-style-type: none"> <li>a) Expand access to psychiatric evaluation and psychopharmacology treatment for OCD</li> <li>b) Offering greater choice (e.g., medications, EX/RP, or their combination) may improve collaboration in care and patient satisfaction</li> <li>c) Medications may be first-line in some situations (e.g., when depression limits adherence to EX/RP)</li> <li>d) Medications may be preferred over EX/RP for patients with predominant contamination fears or handwashing rituals during COVID-19</li> </ul>                                                                                                                                                                                                                                                                                         | <ul style="list-style-type: none"> <li>a) Cannot perform physical exams</li> <li>b) Issues with licensure or medication supply depending on location</li> <li>c) Psychiatric evaluation and medication management over telehealth has not been studied systematically in OCD</li> </ul>                                                                                                                     |
| <b>4. "Virtual" (videoconferencing-assisted) support groups for OCD</b>                      | <ul style="list-style-type: none"> <li>a) Connect patients to others with similar symptoms can reduce loneliness, isolation, and shame, improve confidence, and reinforce techniques learned in CBT</li> <li>b) Inexpensive and accessible</li> <li>c) May be more engaging than phone- or internet-based groups, yet more accessible than in-person groups</li> </ul>                                                                                                                                                                                                                                                                                                                                                                                                                                                                    | <ul style="list-style-type: none"> <li>a) Effectiveness not established for OCD</li> <li>b) Can reinforce accommodation or avoidance of symptoms if not moderated</li> <li>c) Groups using 12-step model are not tested in OCD; some incorporate religious themes which may or may not be a fit for all patients</li> </ul>                                                                                 |
| <b>5. Videoconferencing-assisted clinical training and supervision for OCD treatment</b>     | <ul style="list-style-type: none"> <li>a) Expand access to expert training and supervision for OCD treatment</li> <li>b) Flexibility for supervisor to passively view or actively intervene</li> </ul>                                                                                                                                                                                                                                                                                                                                                                                                                                                                                                                                                                                                                                    | <ul style="list-style-type: none"> <li>a) Remote training models exist but have yet to be adapted for OCD</li> <li>b) Supervisors and/or patients may be unfamiliar with videoconferencing technology</li> <li>c) Treatment model and informed consent must be discussed carefully with patient before starting</li> </ul>                                                                                  |
| <b>Challenges with all videoconferencing strategies</b>                                      | <ul style="list-style-type: none"> <li>a) Technical issues (e.g., poor Wi-fi signal, low-bandwidth connections)</li> <li>b) Lack of private space</li> <li>c) More cognitively demanding than in-person treatment (e.g., due to increased reliance on verbal communication, brief lags in transmission), which may limit satisfaction</li> <li>d) Equipment and internet costs may be problematic</li> <li>e) Some patients may lack access to private space in which to receive remote treatment</li> <li>f) Therapist alliance may be reduced compared to in-person treatment</li> <li>g) Different state licensure policies may limit access</li> <li>h) Telehealth reimbursement models remain in development</li> <li>i) Need to monitor patient safety carefully given challenge in coordinating emergency care remotely</li> </ul> |                                                                                                                                                                                                                                                                                                                                                                                                             |

**Table 2. Strategies for Integrating Videoconferencing into OCD Treatment**
